# Supplementary material
Source: Springer Nature journal article supplement (https://www.springermedizin.de/resource/supplementary/12887_2012_712_MOESM1_ESM.pdf/9475552)

**A****ALT and Ethnicity**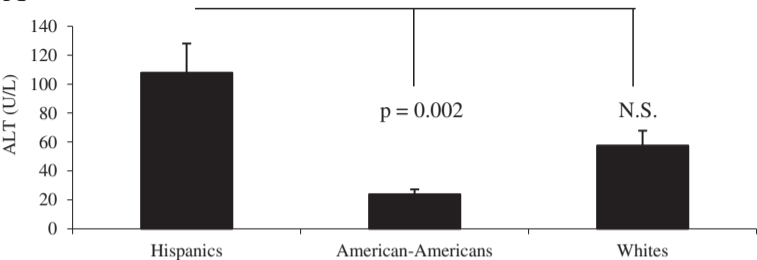**B****AST and Ethnicity**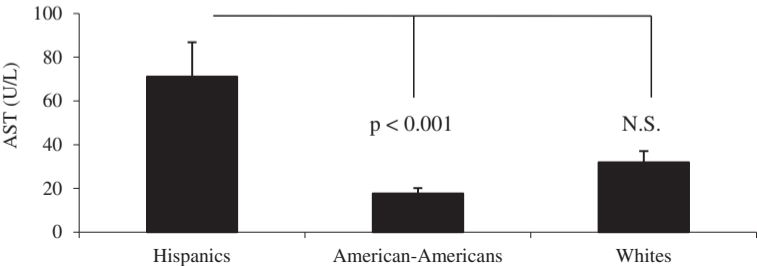

Supplement: MOESM1 [file 9475552]
